# Supplementary material for: In Vitro Assessment of Poly-N-Vinylpyrrolidone/Acrylic Acid Nanoparticles Biocompatibility in a Microvascular Endothelium Model
Source: MDPI journal article supplement (doi:10.3390/ijms232012446), 2022-10-18
Supplement: s1 [file s1]

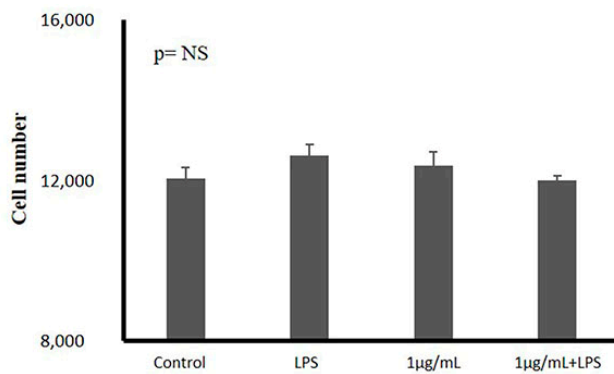

**Figure S1.** Effect of p(VP-AA) on the viability of basal and activated HMEC-1 cells. Effect of low concentration p(VP-AA) NPs (0.001 mg/mL) on HMEC-1 cells' viability. Basal state and exposed to LPS cells were cultured in 96-well plates and treated with p(VP-AA) NPs for 48 hours. The results represent the average of three separate experiments. Statistical significance: NS = not significant.

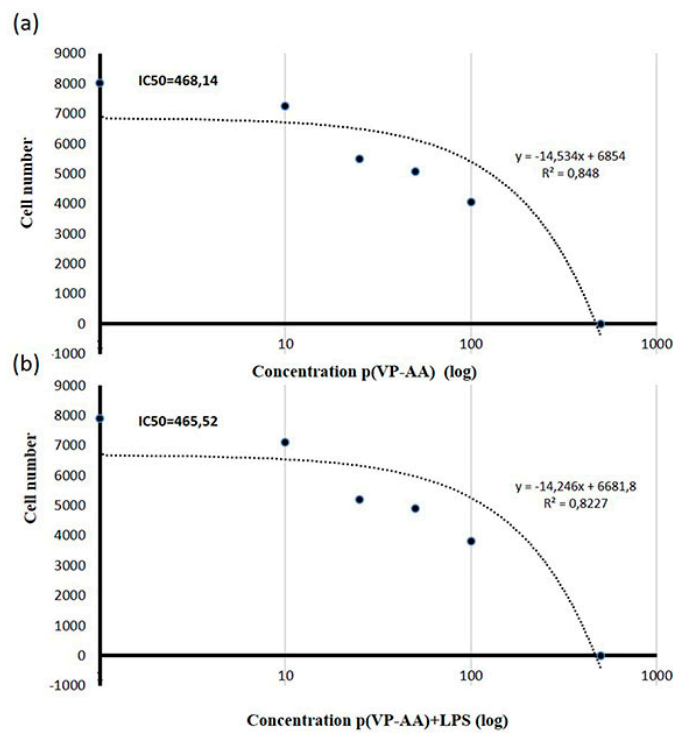

**Figure S2.** Calculation of IC50 for p(VP-AA) concentration in the viability of HMEC-1 cells. Basal state (a) and exposed to LPS (b) cells were cultured in 96-well plates and treated with p(VP-AA) concentrations 1, 10, 25, 50, 100, 500 mg/mL, for 48 hours. IC50 was calculating using the graphs' equation and  $y = 50$ .
